# Supplementary material
Source: publisher site journal article supplement (https://www.dovepress.com/article/303869)
Supplement: Supplementary file 1 [file get_supplementary_file.php]

Appendix A

| Physician's Responses   |                       |                     |                             | Patient's Responses |                      |                       |                               |
|-------------------------|-----------------------|---------------------|-----------------------------|---------------------|----------------------|-----------------------|-------------------------------|
| Questions               | N                     | Mean                | Std. Deviation              | N                   | Mean                 | Std. Deviation        | SIG at ( $\alpha \leq 0.05$ ) |
| Q1                      | 72                    | 4.3056              | 0.79857                     | 248                 | 4.3024               | 0.75907               | 0.840                         |
| Q2                      |                       | 3.7639              | 0.81350                     |                     | 4.1976               | 0.77229               | 0.001*                        |
| Q3                      |                       | 4.6111              | 0.61794                     |                     | 4.2944               | 0.75155               | 0.021*                        |
| All Questions (Average) |                       | 4.2269              | 0.82373                     |                     | 4.2648               | 0.76149               | 0.764                         |
| Physician's Responses   |                       |                     |                             | Patient's Responses |                      |                       |                               |
| SIG Between (Q1-Q2)     | SIG Between (Q1 - Q3) | SIG Between (Q3-Q2) | SIG Between (All QUESTIONS) | SIG Between (Q1-Q2) | SIG Between (Q1- Q3) | SIG Between (Q3 - Q2) | SIG Between (All QUESTIONS)   |
| .0001*                  | 0.190                 | 0.001*              | 0.064                       | 0.088               | 0.080                | 0.155                 | 0.190                         |

Appendix B

| Physician's Responses   |                      |                       |                             | Patient's Responses   |                      |                      |                               |
|-------------------------|----------------------|-----------------------|-----------------------------|-----------------------|----------------------|----------------------|-------------------------------|
| Questions               | N                    | Mean                  | Std. Deviation              | N                     | Mean                 | Std. Deviation       | SIG at ( $\alpha \leq 0.05$ ) |
| Q4                      | 72                   | 4.0694                | 0.89327                     | 248                   | 4.1331               | 0.80134              | 0.699                         |
| Q5                      |                      | 3.7639                | 0.9999                      |                       | 4.1452               | 0.82171              | 0.004*                        |
| Q6                      |                      | 4.1250                | 0.80382                     |                       | 4.1008               | 0.82590              | 0.882                         |
| All Questions (Average) |                      | 3.9861                | 0.91234                     |                       | 4.1263               | 0.81550              | 0.070                         |
| Physician's Responses   |                      |                       |                             | Patient's Responses   |                      |                      |                               |
| SIG Between (Q4 - Q5)   | SIG Between (Q5- Q6) | SIG Between (Q6 - Q4) | SIG Between (All QUESTIONS) | SIG Between (Q4 - Q5) | SIG Between (Q5- Q6) | SIG Between (Q6- Q4) | SIG Between (All QUESTIONS)   |
| 0.068                   | 0.028*               | 0.788                 | 0.063                       | 0.795                 | 0.528                | 0.704                | 0.816                         |

Appendix C

| Physician's Responses   |                      |                       |                             | Patient's Responses   |                     |                      |                               |
|-------------------------|----------------------|-----------------------|-----------------------------|-----------------------|---------------------|----------------------|-------------------------------|
| Questions               | N                    | Mean                  | Std. Deviation              | N                     | Mean                | Std. Deviation       | SIG at ( $\alpha \leq 0.05$ ) |
| Q7                      | 72                   | 4.5556                | 0.55383                     | 248                   | 4.1210              | 0.80578              | 0.001*                        |
| Q8                      |                      | 4.5556                | 0.64762                     |                       | 4.0927              | 0.84620              | 0.001*                        |
| Q9                      |                      | 3.2778                | 1.01012                     |                       | 3.7177              | 1.09145              | 0.001*                        |
| All Questions (Average) |                      | 4.1296                | 0.97018                     |                       | 3.9772              | 0.94007              | 0.001*                        |
| Physician's Responses   |                      |                       |                             | Patient's Responses   |                     |                      |                               |
| SIG Between (Q7 - Q8)   | SIG Between (Q8- Q9) | SIG Between (Q9 - Q7) | SIG Between (All QUESTIONS) | SIG Between (Q7 - Q8) | SIG Between (Q8-Q9) | SIG Between (Q9- Q7) | SIG Between (All QUESTIONS)   |
| 0.730                   | 0.001*               | 0.001*                | 0.001*                      | 0.802                 | 0.001*              | 0.001*               | 0.001*                        |

Appendix D

| Physician's Responses   |                       |                       |                             | Patient's Responses   |                       |                       |                               |
|-------------------------|-----------------------|-----------------------|-----------------------------|-----------------------|-----------------------|-----------------------|-------------------------------|
| Question                | N                     | Mean                  | Std. Deviation              | N                     | Mean                  | Std. Deviation        | SIG at ( $\alpha \leq 0.05$ ) |
| Q10                     | 72                    | 4.2639                | 0.50331                     | 248                   | 4.1008                | 0.84528               | 0.376                         |
| Q11                     |                       | 3.8472                | 0.98809                     |                       | 4.0242                | 0.78409               | 0.290                         |
| Q12                     |                       | 4.2222                | 0.56224                     |                       | 4.1371                | 0.78276               | 0.778                         |
| All Questions (Average) |                       | 4.1111                | 0.73874                     |                       | 4.0874                | 0.80487               | 0.855                         |
| Physician's Responses   |                       |                       |                             | Patient's Responses   |                       |                       |                               |
| SIG Between (Q10-Q11)   | SIG Between (Q10-Q12) | SIG Between (Q11-Q12) | SIG Between (All QUESTIONS) | SIG Between (Q10-Q11) | SIG Between (Q10-Q12) | SIG Between (Q11-Q12) | SIG Between (All QUESTIONS)   |
| 0.018*                  | 0.712                 | 0.040*                | 0.032                       | 0.156                 | 0.747                 | 0.060                 | 0.154                         |

Appendix E

| Physician's Responses   |                       |                       |                             | Patient's Responses   |                       |                       |                               |
|-------------------------|-----------------------|-----------------------|-----------------------------|-----------------------|-----------------------|-----------------------|-------------------------------|
| Questions               | N                     | Mean                  | Std. Deviation              | N                     | Mean                  | Std. Deviation        | SIG at ( $\alpha \leq 0.05$ ) |
| Q13                     | 72                    | 3.4167                | 1.17185                     | 248                   | 3.6895                | 1.03988               | 0.073                         |
| Q14                     |                       | 4.0556                |                             |                       | 4.0766                |                       |                               |
| Q15                     |                       | 4.4444                | 0.60255                     |                       | 4.1492                | 0.75146               | 0.002*                        |
| All Questions (Average) |                       | 3.9722                | 0.92468                     |                       | 3.9718                | 0.89293               | 0.778                         |
| Physician's Responses   |                       |                       |                             | Patient's Responses   |                       |                       |                               |
| SIG Between (Q13-Q14)   | SIG Between (Q13-Q15) | SIG Between (Q14-Q15) | SIG Between (All QUESTIONS) | SIG Between (Q13-Q14) | SIG Between (Q13-Q15) | SIG Between (Q14-Q15) | SIG Between (All QUESTIONS)   |
| 0.001*                  | 0.001*                | 0.002*                | 0.001*                      | 0.003*                | 0.001*                | 0.001*                | 0.001*                        |

Appendix F

| Physician's Responses   |                       |                       |                             | Patient's Responses   |                       |                       |                               |
|-------------------------|-----------------------|-----------------------|-----------------------------|-----------------------|-----------------------|-----------------------|-------------------------------|
| Questions               | N                     | Mean                  | Std. Deviation              | N                     | Mean                  | Std. Deviation        | SIG at ( $\alpha \leq 0.05$ ) |
| Q16                     | 72                    | 4.092                 | 1.00925                     | 248                   | 4.201                 | 0.78426               | 0.874                         |
| Q17                     |                       | 3.375                 | 1.26087                     |                       | 4.064                 | 0.83682               | 0.001*                        |
| Q18                     |                       | 3.541                 | 1.23263                     |                       | 4.024                 | 0.90847               | 0.005                         |
| All Questions (Average) |                       | 3.671                 | 1.20785                     |                       | 4.096                 | 0.84700               | 0.000*                        |
| Physician's Responses   |                       |                       |                             | Patient's Responses   |                       |                       |                               |
| SIG Between (Q16-Q17)   | SIG Between (Q16-Q18) | SIG Between (Q17-Q18) | SIG Between (All QUESTIONS) | SIG Between (Q16-Q17) | SIG Between (Q16-Q18) | SIG Between (Q17-Q18) | SIG Between (All QUESTIONS)   |
| 0.001*                  | 0.003*                | 0.536                 | 0.001*                      | 0.056                 | 0.065                 | 0.781                 | 0.066                         |

Appendix G

| Physician's Responses   |                       |                       |                             | Patient's Responses   |                       |                       |                               |
|-------------------------|-----------------------|-----------------------|-----------------------------|-----------------------|-----------------------|-----------------------|-------------------------------|
| Questions               | N                     | Mean                  | Std. Deviation              | N                     | Mean                  | Std. Deviation        | SIG at ( $\alpha \leq 0.05$ ) |
| Q19                     | 72                    | 3.0694                | 1.11742                     | 248                   | 3.9879                | 0.86536               | 0.001*                        |
| Q20                     |                       | 4.3194                | 0.64625                     |                       | 4.0968                | 0.79898               | 0.049*                        |
| Q21                     |                       | 4.3472                | 0.67469                     |                       | 4.1411                | 0.75838               | 0.045*                        |
| All Questions (Average) |                       | 3.9120                | 1.02827                     |                       | 4.0753                | 0.81025               | 0.185                         |
| Physician's Responses   |                       |                       |                             | Patient's Responses   |                       |                       |                               |
| SIG Between (Q19–Q20)   | SIG Between (Q19–Q21) | SIG Between (Q20–Q21) | SIG Between (All QUESTIONS) | SIG Between (Q19–Q20) | SIG Between (Q19–Q21) | SIG Between (Q20–Q21) | SIG Between (All QUESTIONS)   |
| 0.001*                  | 0.001*                | 0.736                 | 0.001*                      | 0.186                 | 0.063                 | 0.589                 | 0.159                         |

Appendix H

| Physician's Responses   |                       |                       |                             | Patient's Responses   |                       |                       |                               |
|-------------------------|-----------------------|-----------------------|-----------------------------|-----------------------|-----------------------|-----------------------|-------------------------------|
| Questions               | N                     | Mean                  | Std. Deviation              | N                     | Mean                  | Std. Deviation        | SIG at ( $\alpha \leq 0.05$ ) |
| Q.22                    | 72                    | 4.5278                | 0.50273                     | 248                   | 4.2258                | 0.72367               | 0.002*                        |
| Q.23                    |                       | 4.3472                | 0.58526                     |                       | 3.8871                | 0.93263               | 0.001*                        |
| Q.24                    |                       | 3.2778                | 1.01012                     |                       | 3.6452                | 1.04315               | 0.005*                        |
| All Questions (Average) |                       | 4.0509                | 0.91611                     |                       | 3.9194                | 0.93903               | 0.698                         |
| Physician's Responses   |                       |                       |                             | Patient's Responses   |                       |                       |                               |
| SIG Between (Q22–Q23)   | SIG Between (Q22–Q24) | SIG Between (Q23–Q24) | SIG Between (All QUESTIONS) | SIG Between (Q22–Q23) | SIG Between (Q22–Q24) | SIG Between (Q23–Q24) | SIG Between (All QUESTIONS)   |
| 0.074                   | 0.001*                | 0.001*                | 0.001*                      | 0.001*                | 0.001*                | 0.010                 | 0.001*                        |

Appendix I

| Physician's Responses   |                       |                       |                             | Patient's Responses   |                       |                       |                               |
|-------------------------|-----------------------|-----------------------|-----------------------------|-----------------------|-----------------------|-----------------------|-------------------------------|
| Questions               | N                     | Mean                  | Std. Deviation              | N                     | Mean                  | Std. Deviation        | SIG at ( $\alpha \leq 0.05$ ) |
| Q25                     | 72                    | 2.8889                | 1.15741                     | 248                   | 3.6694                | 1.17822               | 0.001*                        |
| Q26                     |                       | 3.2639                | 1.21020                     |                       | 3.5524                | 1.21948               | 0.049*                        |
| Q27                     |                       | 3.9028                | 0.95179                     |                       | 3.9718                | 1.00767               | 0.419                         |
| All Questions (Average) |                       | 3.3519                | 1.18373                     |                       | 3.7312                | 1.15095               | 0.001*                        |
| Physician's Responses   |                       |                       |                             | Patient's Responses   |                       |                       |                               |
| SIG Between (Q25–Q26)   | SIG Between (Q25–Q27) | SIG Between (Q26–Q27) | SIG Between (All QUESTIONS) | SIG Between (Q25–Q26) | SIG Between (Q25–Q27) | SIG Between (Q26–Q27) | SIG Between (All QUESTIONS)   |
| 0.315                   | 0.004*                | 0.001*                | 0.001*                      | 0.052*                | 0.001*                | 0.001*                | 0.001*                        |

## Patient Questionnaire

Thank God for your recovery from Corona disease, and we will be grateful to you for taking the time to complete this questionnaire.

This questionnaire aims to understand the most important communication skills that doctors use with Corona patients, and the extent of the impact of these communication skills on the psychological aspects of the patient.

We assure you that this questionnaire is going to be completely confidential and contains no names to comply with medical ethics.

Kindly be informed that the data coming out of this questionnaire will be anonymously used as a part of a study organized by a team of researchers from the German Jordanian University.

By filling in this questionnaire, you consent us to use these data for scientific research.

| Patients' Questionnaire                                                                          |                                                                                                                       |                |       |          |          |                   |
|--------------------------------------------------------------------------------------------------|-----------------------------------------------------------------------------------------------------------------------|----------------|-------|----------|----------|-------------------|
| No.                                                                                              | Questions                                                                                                             | Strongly Agree | Agree | Not Sure | Disagree | Strongly Disagree |
| <b>First section: The effect of the physician's acceptance of the patient's pre-information.</b> |                                                                                                                       |                |       |          |          |                   |
| Q1.                                                                                              | The physician's acceptance of the information I provide to him/her made me aware of his/her interest in my condition. |                |       |          |          |                   |
| Q2.                                                                                              | I felt good when the physician accepted my opinion.                                                                   |                |       |          |          |                   |
| Q3                                                                                               | The physician's advice not to believe the information I found on social media has positively impacted my mood.        |                |       |          |          |                   |
| <b>Second section: The effect of providing the patient with information.</b>                     |                                                                                                                       |                |       |          |          |                   |
| Q4.                                                                                              | Sharing of positive disease statistics by the physician reduced my fear of the symptoms of the disease.               |                |       |          |          |                   |
| Q5.                                                                                              | My physician's information on my case helped reduce my anxiety.                                                       |                |       |          |          |                   |
| Q6.                                                                                              | The physician's answers to my frequent inquiries about the disease reassured me about the status of my health.        |                |       |          |          |                   |
| <b>Third section: The effect of the physician's sympathy.</b>                                    |                                                                                                                       |                |       |          |          |                   |
| Q7.                                                                                              | The physician's facial expression comforted me.                                                                       |                |       |          |          |                   |
| Q8.                                                                                              | The physician's use of polite phrases when describing my illness eased my fears and anxiety.                          |                |       |          |          |                   |
| Q9.                                                                                              | The physician positioning himself/herself next to me gave me comfort.                                                 |                |       |          |          |                   |
| <b>Fourth section: The effect of the physician's strategy (slow down).</b>                       |                                                                                                                       |                |       |          |          |                   |
| Q10.                                                                                             | The physicians' slow pace when talking to me gave the impression that he was interested in my case.                   |                |       |          |          |                   |
| Q11.                                                                                             | Not being overwhelmed with the physician's medical information and procedures positively impacted my mood.            |                |       |          |          |                   |
| Q12.                                                                                             | By explaining my treatment procedures slowly, the physician helped to increase my confidence in these procedures.     |                |       |          |          |                   |
| <b>Fifth section: The effect of the physician simplifying my disease for me.</b>                 |                                                                                                                       |                |       |          |          |                   |
| Q13.                                                                                             | By not sharing my laboratory reports when describing my condition, the physician reduced my anxiety.                  |                |       |          |          |                   |
| Q14.                                                                                             | The physician's detailed explanation of my condition affected me positively.                                          |                |       |          |          |                   |
| Q15.                                                                                             | Using common and simple terms while describing my condition reduced my anxiety.                                       |                |       |          |          |                   |

| <b>Sixth section: The effect of the physician's honesty with the patients</b>             |                                                                                                                                               |  |  |  |  |  |
|-------------------------------------------------------------------------------------------|-----------------------------------------------------------------------------------------------------------------------------------------------|--|--|--|--|--|
| <b>Q16.</b>                                                                               | The physician's frankness motivated me to implement his instructions fully.                                                                   |  |  |  |  |  |
| <b>Q17.</b>                                                                               | The physician's detailed explanation of the symptoms' development increased my interest in obeying the physician instructions.                |  |  |  |  |  |
| <b>Q18.</b>                                                                               | Being informed by the physician that there is no current treatment for the disease helped me to adhere fully to the physician's instructions. |  |  |  |  |  |
| <b>Seventh section: The effect of the physician giving the patient hope and optimism.</b> |                                                                                                                                               |  |  |  |  |  |
| <b>Q19.</b>                                                                               | The physician's downplaying of the symptoms of the disease raised my spirits.                                                                 |  |  |  |  |  |
| <b>Q20.</b>                                                                               | The encouraging words used by the physician boosted my self-confidence.                                                                       |  |  |  |  |  |
| <b>Q21.</b>                                                                               | Providing me with optimistic new scientific information on the disease improved my mood.                                                      |  |  |  |  |  |
| <b>Eighth section: The effect of the physician's positive response on me.</b>             |                                                                                                                                               |  |  |  |  |  |
| <b>Q22.</b>                                                                               | The physician's positive reaction towards my results raised my spirits.                                                                       |  |  |  |  |  |
| <b>Q23.</b>                                                                               | The physician's eye contact with me improved my mood.                                                                                         |  |  |  |  |  |
| <b>Q24.</b>                                                                               | The physician sitting next to me while explaining my condition made me feel important to him.                                                 |  |  |  |  |  |
| <b>Ninth section: The effect of the physician's negative response.</b>                    |                                                                                                                                               |  |  |  |  |  |
| <b>Q25.</b>                                                                               | The physician's use of firm language affected my ability to follow the treatment prescribed.                                                  |  |  |  |  |  |
| <b>Q26.</b>                                                                               | The physician's anxiety affected the acceptance of my health condition negatively.                                                            |  |  |  |  |  |
| <b>Q27.</b>                                                                               | The physician's preoccupation with other things while communicating with me affected my acceptance of his views.                              |  |  |  |  |  |

# Physician Questionnaire

Dear Dr,

We would like to thank you for the great effort that you are making during the current Corona pandemic, and we are grateful to you for taking the time to complete this questionnaire.

This questionnaire aims to understand the most important communication skills that doctors use with Corona patients, and the extent of the impact of these communication skills on the psychological aspects of the patient .

We would like to assure you that this questionnaire is completely confidential and contains no names to comply with medical ethics. It is part of a study organized by a team of researchers from the German Jordanian University

| Physician's Questionnaire                                                                       |                                                                                               |                |       |          |          |                   |
|-------------------------------------------------------------------------------------------------|-----------------------------------------------------------------------------------------------|----------------|-------|----------|----------|-------------------|
| No.                                                                                             | Questions                                                                                     | Strongly Agree | Agree | Not Sure | Disagree | Strongly Disagree |
| <b>First Section:</b> Physician's acceptance of pre- information from patients.                 |                                                                                               |                |       |          |          |                   |
| Q1.                                                                                             | I accept the information that the patient provides me with.                                   |                |       |          |          |                   |
| Q2.                                                                                             | I accept the patient's opinion on his/her medical condition.                                  |                |       |          |          |                   |
| Q3.                                                                                             | I advise the patient not to believe the information found on social media.                    |                |       |          |          |                   |
| <b>Second section:</b> The extent to which the physician provides the patient with information. |                                                                                               |                |       |          |          |                   |
| Q4.                                                                                             | I inform the patient of positive disease statistics periodically.                             |                |       |          |          |                   |
| Q5.                                                                                             | I provide the patient with the information they want.                                         |                |       |          |          |                   |
| Q6.                                                                                             | I frequently answer patient's inquiries about the disease.                                    |                |       |          |          |                   |
| <b>Third section:</b> The extent of the physician's sympathy towards the patient.               |                                                                                               |                |       |          |          |                   |
| Q7.                                                                                             | I present a friendly expression on my face when I contact the patient.                        |                |       |          |          |                   |
| Q8.                                                                                             | I use polite phrases like (father, mother, brother, my dear ...) when talking to the patient. |                |       |          |          |                   |
| Q9.                                                                                             | I sit next to the patient.                                                                    |                |       |          |          |                   |
| <b>Fourth section:</b> The physician's strategy (slow down).                                    |                                                                                               |                |       |          |          |                   |
| Q10.                                                                                            | I talk slowly to the patient.                                                                 |                |       |          |          |                   |
| Q11.                                                                                            | I do not burden the patient with medical test results and procedures.                         |                |       |          |          |                   |
| Q12.                                                                                            | I take the time to explain the patient's treatment procedures.                                |                |       |          |          |                   |
| <b>Fifth section:</b> The extent to which the physician simplifies the disease for the patient. |                                                                                               |                |       |          |          |                   |
| Q13.                                                                                            | I use the patient's laboratory reports to describe their condition frankly.                   |                |       |          |          |                   |
| Q14.                                                                                            | I take time to explain the patient's medical condition to him/her.                            |                |       |          |          |                   |
| Q15.                                                                                            | I use common and simple terms to describe the patient's condition to him/her.                 |                |       |          |          |                   |
| <b>Sixth section:</b> The extent of the physician's honesty with the patients.                  |                                                                                               |                |       |          |          |                   |

|                                                                                                    |                                                                                                       |  |  |  |  |  |
|----------------------------------------------------------------------------------------------------|-------------------------------------------------------------------------------------------------------|--|--|--|--|--|
| <b>Q16.</b>                                                                                        | I am honest with the patient regarding the details of their medical condition.                        |  |  |  |  |  |
| <b>Q17.</b>                                                                                        | I inform the patient that the symptoms of the disease will develop over time.                         |  |  |  |  |  |
| <b>Q18.</b>                                                                                        | I sympathetically inform the patient that there is no current treatment.                              |  |  |  |  |  |
| <b>Seventh section: The extent to which the physician gives hope and optimism to the patients.</b> |                                                                                                       |  |  |  |  |  |
| <b>Q19.</b>                                                                                        | I downplay disease symptoms when talking to the patient.                                              |  |  |  |  |  |
| <b>Q20.</b>                                                                                        | I use encouraging words to support the patient.                                                       |  |  |  |  |  |
| <b>Q21.</b>                                                                                        | I provide the patient with optimistic new scientific information on the disease.                      |  |  |  |  |  |
| <b>Eighth section: The extent of the physician's positive reaction to the patients.</b>            |                                                                                                       |  |  |  |  |  |
| <b>Q22.</b>                                                                                        | I share with the patient my happiness if their condition improves.                                    |  |  |  |  |  |
| <b>Q23.</b>                                                                                        | I maintain eye contact with the patient when talking to him/her.                                      |  |  |  |  |  |
| <b>Q24.</b>                                                                                        | I sit next to the patient, and I respect social distancing while comforting the patient.              |  |  |  |  |  |
| <b>Ninth section: The extent of the physician's negative reaction to the patients.</b>             |                                                                                                       |  |  |  |  |  |
| <b>Q25.</b>                                                                                        | I use firm language with the patient when he/she is not responding to instructions.                   |  |  |  |  |  |
| <b>Q26.</b>                                                                                        | My work stress affects my communication with the patient.                                             |  |  |  |  |  |
| <b>Q27.</b>                                                                                        | I get distracted by outside influences, people or the telephone while communicating with the patient. |  |  |  |  |  |

**Raw Data for Pilot Session by Patients**  
 1=Strongly Disagree, 2=Disagree, 3=Neutral, 4=Agree, 5=Strongly Agree

| Q 1 | Q 2 | Q 3 | Q 4 | Q 5 | Q 6 | Q 7 | Q 8 | Q 9 | Q1 0 | Q1 1 | Q1 2 | Q1 3 | Q1 4 | Q1 5 | Q1 6 | Q1 7 | Q1 8 | Q1 9 | Q2 0 | Q2 1 | Q2 2 | Q2 3 | Q2 4 | Q2 5 | Q2 6 | Q2 7 |
|-----|-----|-----|-----|-----|-----|-----|-----|-----|------|------|------|------|------|------|------|------|------|------|------|------|------|------|------|------|------|------|
| 4   | 4   | 5   | 3   | 5   | 4   | 5   | 5   | 2   | 5    | 4    | 5    | 2    | 5    | 3    | 5    | 2    | 3    | 3    | 4    | 5    | 4    | 3    | 3    | 2    | 1    | 2    |
| 5   | 4   | 5   | 5   | 4   | 5   | 4   | 4   | 3   | 4    | 4    | 4    | 4    | 4    | 5    | 3    | 3    | 2    | 5    | 5    | 5    | 5    | 5    | 5    | 1    | 1    | 1    |
| 5   | 5   | 4   | 4   | 4   | 5   | 5   | 3   | 5   | 5    | 5    | 5    | 5    | 3    | 4    | 4    | 3    | 5    | 4    | 4    | 4    | 5    | 1    | 5    | 4    | 4    | 4    |
| 5   | 5   | 5   | 3   | 3   | 3   | 4   | 2   | 4   | 3    | 2    | 4    | 4    | 3    | 3    | 3    | 5    | 3    | 4    | 5    | 5    | 5    | 2    | 3    | 1    | 2    | 2    |
| 5   | 5   | 4   | 5   | 5   | 2   | 2   | 4   | 4   | 4    | 5    | 2    | 2    | 5    | 4    | 5    | 4    | 3    | 3    | 3    | 4    | 4    | 3    | 4    | 2    | 2    | 5    |
| 4   | 4   | 4   | 5   | 4   | 3   | 5   | 4   | 2   | 5    | 4    | 5    | 5    | 4    | 4    | 5    | 4    | 3    | 4    | 4    | 5    | 4    | 4    | 3    | 2    | 4    | 4    |
| 4   | 4   | 4   | 5   | 3   | 2   | 2   | 5   | 5   | 3    | 5    | 4    | 4    | 5    | 5    | 4    | 3    | 5    | 4    | 5    | 5    | 4    | 4    | 3    | 5    | 5    | 5    |
| 4   | 5   | 5   | 4   | 5   | 5   | 5   | 2   | 5   | 4    | 4    | 5    | 3    | 3    | 3    | 4    | 3    | 4    | 2    | 4    | 3    | 4    | 5    | 3    | 4    | 2    | 2    |
| 4   | 5   | 5   | 5   | 4   | 5   | 5   | 3   | 4   | 4    | 5    | 5    | 2    | 4    | 4    | 3    | 5    | 4    | 4    | 5    | 4    | 4    | 4    | 3    | 1    | 1    | 5    |
| 3   | 2   | 5   | 3   | 3   | 2   | 3   | 2   | 2   | 3    | 4    | 3    | 3    | 3    | 2    | 2    | 3    | 3    | 2    | 3    | 3    | 3    | 3    | 2    | 3    | 3    | 2    |

**Raw Data for Pilot Session by Physicians**  
 1=Strongly Disagree, 2=Disagree, 3=Neutral, 4=Agree, 5=Strongly Agree

| Q 1 | Q 2 | Q 3 | Q 4 | Q 5 | Q 6 | Q 7 | Q 8 | Q 9 | Q1 0 | Q1 1 | Q1 2 | Q1 3 | Q1 4 | Q1 5 | Q1 6 | Q1 7 | Q1 8 | Q1 9 | Q2 0 | Q2 1 | Q2 2 | Q2 3 | Q2 4 | Q2 5 | Q2 6 | Q2 7 |
|-----|-----|-----|-----|-----|-----|-----|-----|-----|------|------|------|------|------|------|------|------|------|------|------|------|------|------|------|------|------|------|
| 2   | 2   | 5   | 5   | 4   | 5   | 4   | 5   | 3   | 4    | 5    | 4    | 3    | 4    | 4    | 2    | 2    | 4    | 4    | 5    | 3    | 5    | 5    | 5    | 2    | 4    | 4    |
| 5   | 4   | 5   | 5   | 5   | 4   | 3   | 4   | 5   | 4    | 4    | 5    | 5    | 3    | 5    | 4    | 3    | 4    | 2    | 5    | 5    | 5    | 4    | 4    | 2    | 4    | 4    |
| 5   | 4   | 4   | 3   | 2   | 4   | 5   | 4   | 2   | 4    | 4    | 4    | 4    | 5    | 4    | 5    | 2    | 5    | 2    | 5    | 5    | 4    | 5    | 2    | 2    | 2    | 4    |
| 3   | 3   | 5   | 4   | 2   | 2   | 5   | 4   | 2   | 5    | 2    | 5    | 4    | 4    | 4    | 2    | 2    | 4    | 2    | 4    | 4    | 4    | 4    | 2    | 2    | 5    | 4    |
| 2   | 2   | 4   | 2   | 2   | 3   | 4   | 5   | 2   | 4    | 4    | 4    | 4    | 4    | 4    | 2    | 2    | 4    | 4    | 4    | 4    | 4    | 4    | 2    | 1    | 2    | 5    |

**Raw Data for Physician's Responses**  
 1=Strongly Disagree, 2=Disagree, 3=Neutral, 4=Agree, 5=Strongly Agree

| Q 1 | Q 2 | Q 3 | Q 4 | Q 5 | Q 6 | Q 7 | Q 8 | Q 9 | Q1 0 | Q1 1 | Q1 2 | Q1 3 | Q1 4 | Q1 5 | Q1 6 | Q1 7 | Q1 8 | Q1 9 | Q2 0 | Q2 1 | Q2 2 | Q2 3 | Q2 4 | Q2 5 | Q2 6 | Q2 7 |
|-----|-----|-----|-----|-----|-----|-----|-----|-----|------|------|------|------|------|------|------|------|------|------|------|------|------|------|------|------|------|------|
| 4   | 5   | 5   | 5   | 3   | 4   | 5   | 5   | 4   | 4    | 5    | 4    | 2    | 4    | 5    | 5    | 4    | 1    | 5    | 3    | 5    | 5    | 4    | 4    | 2    | 3    | 4    |



|   |   |   |   |   |   |   |   |   |   |   |   |   |   |   |   |   |   |   |   |   |   |   |   |   |   |   |   |
|---|---|---|---|---|---|---|---|---|---|---|---|---|---|---|---|---|---|---|---|---|---|---|---|---|---|---|---|
| 5 | 3 | 4 | 3 | 4 | 5 | 3 | 5 | 3 | 4 | 2 | 3 | 3 | 4 | 5 | 3 | 3 | 3 | 4 | 3 | 3 | 4 | 4 | 4 | 2 | 5 | 4 |   |
| 5 | 2 | 3 | 3 | 5 | 5 | 5 | 5 | 5 | 5 | 4 | 5 | 5 | 3 | 5 | 5 | 5 | 1 | 5 | 4 | 5 | 5 | 5 | 5 | 4 | 4 | 2 |   |
| 3 | 2 | 5 | 4 | 5 | 4 | 5 | 5 | 3 | 4 | 4 | 4 | 3 | 4 | 4 | 5 | 3 | 4 | 2 | 4 | 5 | 5 | 5 | 5 | 3 | 5 | 3 |   |
| 5 | 3 | 3 | 5 | 5 | 5 | 5 | 5 | 3 | 5 | 5 | 5 | 5 | 5 | 5 | 5 | 5 | 1 | 2 | 4 | 5 | 5 | 5 | 3 | 3 | 1 | 3 |   |
| 3 | 3 | 4 | 4 | 4 | 5 | 5 | 4 | 4 | 4 | 3 | 5 | 5 | 5 | 5 | 5 | 4 | 3 | 3 | 3 | 4 | 4 | 5 | 4 | 1 | 2 | 3 |   |
| 3 | 2 | 4 | 4 | 4 | 4 | 4 | 4 | 2 | 4 | 5 | 4 | 4 | 4 | 4 | 4 | 3 | 4 | 2 | 3 | 4 | 5 | 4 | 4 | 3 | 3 | 1 |   |
| 2 | 3 | 5 | 3 | 5 | 5 | 5 | 5 | 3 | 4 | 5 | 4 | 5 | 5 | 5 | 4 | 4 | 1 | 1 | 5 | 5 | 5 | 5 | 5 | 4 | 2 | 4 |   |
| 4 | 5 | 5 | 5 | 3 | 4 | 5 | 5 | 4 | 4 | 5 | 4 | 2 | 4 | 5 | 5 | 4 | 1 | 2 | 4 | 5 | 5 | 4 | 4 | 5 | 2 | 4 |   |
| 4 | 5 | 5 | 5 | 3 | 4 | 5 | 5 | 4 | 4 | 5 | 4 | 2 | 4 | 5 | 5 | 4 | 1 | 2 | 4 | 5 | 5 | 4 | 4 | 5 | 3 | 4 |   |
| 5 | 4 | 5 | 5 | 4 | 4 | 4 | 5 | 2 | 5 | 3 | 4 | 4 | 5 | 5 | 5 | 5 | 5 | 4 | 5 | 3 | 4 | 3 | 2 | 5 | 5 | 3 |   |
| 5 | 4 | 5 | 5 | 4 | 4 | 4 | 5 | 2 | 5 | 3 | 4 | 4 | 5 | 5 | 5 | 5 | 5 | 4 | 5 | 3 | 4 | 3 | 2 | 5 | 5 | 3 |   |
| 5 | 4 | 5 | 5 | 2 | 5 | 5 | 5 | 2 | 5 | 4 | 5 | 4 | 4 | 4 | 5 | 5 | 4 | 4 | 4 | 5 | 5 | 4 | 5 | 2 | 4 | 4 |   |
| 5 | 4 | 5 | 4 | 2 | 5 | 4 | 5 | 2 | 4 | 4 | 4 | 4 | 4 | 5 | 5 | 3 | 4 | 5 | 5 | 4 | 4 | 4 | 2 | 2 | 2 | 3 |   |
| 4 | 3 | 4 | 4 | 4 | 4 | 4 | 4 | 3 | 3 | 3 | 3 | 4 | 3 | 4 | 4 | 5 | 3 | 4 | 2 | 4 | 4 | 4 | 5 | 5 | 3 | 4 | 4 |
| 4 | 4 | 4 | 4 | 4 | 4 | 4 | 4 | 3 | 3 | 4 | 4 | 4 | 4 | 4 | 3 | 4 | 4 | 1 | 4 | 3 | 4 | 4 | 4 | 1 | 4 | 2 | 3 |
| 4 | 4 | 3 | 3 | 4 | 4 | 5 | 4 | 4 | 4 | 4 | 4 | 5 | 2 | 4 | 4 | 4 | 4 | 2 | 4 | 4 | 4 | 5 | 5 | 5 | 5 | 4 | 2 |
| 5 | 5 | 5 | 5 | 5 | 5 | 5 | 5 | 2 | 3 | 5 | 5 | 5 | 5 | 5 | 5 | 5 | 2 | 3 | 3 | 4 | 5 | 4 | 4 | 4 | 3 | 2 | 4 |
| 4 | 4 | 5 | 4 | 3 | 4 | 5 | 5 | 4 | 4 | 5 | 4 | 2 | 4 | 5 | 4 | 4 | 4 | 4 | 5 | 5 | 4 | 4 | 4 | 4 | 5 | 3 | 2 |
| 4 | 4 | 4 | 5 | 4 | 4 | 4 | 5 | 4 | 4 | 4 | 4 | 4 | 4 | 5 | 4 | 4 | 4 | 4 | 4 | 5 | 4 | 5 | 4 | 2 | 2 | 5 | 2 |
| 4 | 4 | 4 | 4 | 4 | 5 | 4 | 4 | 5 | 4 | 3 | 5 | 5 | 4 | 4 | 4 | 4 | 4 | 4 | 4 | 4 | 4 | 4 | 5 | 2 | 2 | 5 | 2 |
| 4 | 4 | 5 | 4 | 4 | 4 | 4 | 4 | 3 | 4 | 4 | 4 | 4 | 4 | 4 | 4 | 4 | 4 | 2 | 4 | 4 | 4 | 4 | 4 | 2 | 2 | 4 | 4 |
| 4 | 4 | 5 | 4 | 3 | 4 | 5 | 5 | 4 | 4 | 5 | 4 | 2 | 4 | 5 | 4 | 4 | 4 | 3 | 5 | 5 | 4 | 4 | 4 | 2 | 2 | 3 | 4 |
| 5 | 4 | 5 | 3 | 5 | 5 | 5 | 5 | 3 | 4 | 4 | 4 | 2 | 3 | 4 | 5 | 4 | 5 | 3 | 5 | 5 | 4 | 3 | 3 | 5 | 2 | 4 |   |
| 5 | 4 | 5 | 5 | 4 | 5 | 5 | 5 | 2 | 5 | 4 | 5 | 5 | 3 | 5 | 3 | 5 | 4 | 2 | 5 | 5 | 5 | 5 | 5 | 5 | 3 | 5 | 5 |
| 4 | 4 | 5 | 4 | 3 | 4 | 5 | 5 | 4 | 4 | 5 | 4 | 3 | 4 | 5 | 4 | 4 | 4 | 3 | 5 | 5 | 4 | 4 | 4 | 4 | 5 | 3 | 4 |
| 4 | 5 | 5 | 5 | 3 | 4 | 5 | 5 | 3 | 4 | 4 | 4 | 3 | 4 | 5 | 5 | 5 | 5 | 4 | 5 | 5 | 5 | 5 | 5 | 3 | 3 | 3 | 4 |
| 5 | 4 | 5 | 4 | 3 | 4 | 5 | 5 | 3 | 4 | 4 | 4 | 2 | 4 | 4 | 4 | 4 | 5 | 5 | 5 | 5 | 5 | 5 | 4 | 3 | 5 | 3 | 4 |

|   |   |   |   |   |   |   |   |   |   |   |   |   |   |   |   |   |   |   |   |   |   |   |   |   |   |   |   |
|---|---|---|---|---|---|---|---|---|---|---|---|---|---|---|---|---|---|---|---|---|---|---|---|---|---|---|---|
| 4 | 4 | 5 | 5 | 3 | 4 | 5 | 5 | 3 | 4 | 5 | 5 | 2 | 4 | 5 | 4 | 4 | 5 | 4 | 5 | 4 | 5 | 4 | 3 | 4 | 3 | 4 |   |
| 5 | 4 | 4 | 4 | 3 | 4 | 5 | 5 | 5 | 4 | 4 | 4 | 3 | 4 | 5 | 5 | 5 | 4 | 4 | 4 | 4 | 4 | 4 | 3 | 4 | 3 | 4 |   |
| 5 | 4 | 5 | 5 | 4 | 3 | 4 | 5 | 3 | 4 | 4 | 4 | 3 | 4 | 5 | 5 | 4 | 4 | 4 | 5 | 5 | 4 | 4 | 3 | 4 | 4 | 4 |   |
| 5 | 5 | 5 | 4 | 3 | 3 | 3 | 4 | 2 | 4 | 3 | 3 | 2 | 4 | 3 | 3 | 3 | 4 | 3 | 4 | 4 | 4 | 4 | 2 | 4 | 3 | 3 |   |
| 5 | 5 | 4 | 4 | 2 | 4 | 5 | 5 | 2 | 4 | 4 | 4 | 2 | 3 | 4 | 4 | 2 | 4 | 4 | 4 | 5 | 5 | 4 | 4 | 4 | 3 | 3 |   |
| 4 | 3 | 5 | 5 | 5 | 5 | 5 | 5 | 5 | 5 | 5 | 5 | 5 | 5 | 5 | 5 | 5 | 5 | 5 | 2 | 5 | 5 | 5 | 5 | 3 | 2 | 2 | 5 |
| 5 | 4 | 5 | 5 | 4 | 4 | 5 | 5 | 2 | 4 | 5 | 4 | 2 | 4 | 5 | 5 | 5 | 4 | 4 | 5 | 4 | 5 | 4 | 3 | 2 | 3 | 4 |   |
| 5 | 4 | 5 | 5 | 4 | 4 | 5 | 5 | 2 | 4 | 5 | 4 | 2 | 4 | 5 | 5 | 5 | 4 | 4 | 5 | 4 | 5 | 4 | 3 | 2 | 3 | 4 |   |
| 4 | 4 | 4 | 3 | 4 | 4 | 4 | 5 | 3 | 5 | 4 | 4 | 4 | 4 | 4 | 4 | 3 | 3 | 4 | 4 | 4 | 5 | 5 | 4 | 3 | 4 | 5 |   |
| 4 | 3 | 5 | 5 | 5 | 4 | 5 | 5 | 5 | 5 | 4 | 5 | 5 | 4 | 5 | 5 | 4 | 5 | 4 | 5 | 5 | 5 | 5 | 3 | 4 | 5 | 4 |   |
| 4 | 4 | 4 | 4 | 4 | 4 | 4 | 4 | 4 | 4 | 4 | 3 | 2 | 4 | 4 | 3 | 4 | 4 | 4 | 4 | 4 | 4 | 4 | 4 | 3 | 5 | 5 |   |
| 4 | 4 | 3 | 4 | 5 | 5 | 5 | 5 | 4 | 4 | 4 | 5 | 2 | 4 | 5 | 5 | 3 | 4 | 3 | 5 | 5 | 5 | 5 | 4 | 2 | 4 | 4 |   |
| 4 | 4 | 3 | 4 | 5 | 5 | 5 | 5 | 2 | 4 | 3 | 4 | 3 | 3 | 5 | 3 | 2 | 3 | 4 | 5 | 4 | 4 | 5 | 2 | 3 | 5 | 5 |   |
| 4 | 4 | 4 | 4 | 4 | 4 | 4 | 4 | 4 | 4 | 4 | 3 | 2 | 4 | 4 | 3 | 4 | 4 | 4 | 4 | 4 | 4 | 4 | 4 | 3 | 5 | 5 |   |
| 5 | 4 | 5 | 4 | 4 | 4 | 5 | 5 | 5 | 4 | 4 | 4 | 3 | 3 | 4 | 4 | 5 | 5 | 5 | 5 | 5 | 5 | 5 | 5 | 2 | 5 | 5 |   |
| 4 | 3 | 5 | 4 | 4 | 2 | 5 | 5 | 2 | 5 | 5 | 4 | 4 | 5 | 5 | 3 | 2 | 4 | 5 | 4 | 5 | 5 | 4 | 2 | 2 | 5 | 5 |   |
| 4 | 3 | 5 | 5 | 5 | 4 | 5 | 5 | 5 | 5 | 4 | 5 | 5 | 4 | 5 | 5 | 4 | 5 | 4 | 5 | 5 | 5 | 5 | 3 | 4 | 5 | 4 |   |
| 5 | 4 | 5 | 4 | 4 | 4 | 4 | 5 | 3 | 4 | 4 | 4 | 2 | 4 | 4 | 4 | 5 | 5 | 4 | 5 | 5 | 5 | 5 | 3 | 5 | 4 | 4 |   |
| 5 | 4 | 5 | 5 | 4 | 4 | 4 | 5 | 2 | 5 | 5 | 4 | 2 | 4 | 5 | 5 | 5 | 5 | 3 | 5 | 5 | 4 | 4 | 2 | 4 | 4 | 4 |   |
| 5 | 4 | 5 | 5 | 2 | 2 | 4 | 5 | 4 | 4 | 4 | 5 | 2 | 4 | 4 | 4 | 4 | 5 | 2 | 5 | 5 | 5 | 4 | 3 | 2 | 4 | 4 |   |
| 5 | 4 | 5 | 5 | 3 | 3 | 5 | 5 | 2 | 4 | 5 | 4 | 2 | 5 | 5 | 5 | 5 | 4 | 4 | 4 | 5 | 5 | 4 | 2 | 2 | 2 | 5 |   |
| 4 | 4 | 5 | 5 | 3 | 4 | 5 | 5 | 3 | 4 | 5 | 4 | 3 | 4 | 4 | 5 | 5 | 4 | 4 | 5 | 5 | 5 | 4 | 3 | 2 | 4 | 4 |   |
| 3 | 3 | 5 | 4 | 2 | 4 | 4 | 4 | 3 | 4 | 4 | 3 | 2 | 4 | 4 | 2 | 2 | 4 | 3 | 4 | 4 | 4 | 3 | 3 | 2 | 4 | 4 |   |
| 4 | 2 | 5 | 4 | 2 | 2 | 4 | 4 | 2 | 4 | 4 | 4 | 2 | 4 | 4 | 2 | 2 | 4 | 2 | 4 | 4 | 4 | 4 | 2 | 2 | 4 | 4 |   |
| 2 | 2 | 5 | 2 | 2 | 3 | 4 | 4 | 2 | 4 | 4 | 4 | 4 | 4 | 4 | 2 | 2 | 4 | 2 | 4 | 4 | 4 | 4 | 2 | 2 | 4 | 4 |   |
| 3 | 3 | 5 | 3 | 2 | 4 | 4 | 5 | 2 | 4 | 4 | 4 | 4 | 4 | 4 | 2 | 2 | 4 | 2 | 4 | 4 | 4 | 4 | 2 | 2 | 4 | 4 |   |
| 2 | 2 | 5 | 5 | 2 | 2 | 4 | 5 | 2 | 4 | 5 | 5 | 4 | 4 | 4 | 2 | 2 | 4 | 4 | 5 | 5 | 4 | 4 | 2 | 2 | 2 | 4 |   |

|   |   |   |   |   |   |   |   |   |   |   |   |   |   |   |   |   |   |   |   |   |   |   |   |   |   |   |
|---|---|---|---|---|---|---|---|---|---|---|---|---|---|---|---|---|---|---|---|---|---|---|---|---|---|---|
| 5 | 4 | 5 | 4 | 4 | 4 | 4 | 4 | 3 | 4 | 4 | 4 | 3 | 3 | 4 | 4 | 3 | 4 | 4 | 5 | 3 | 5 | 5 | 4 | 2 | 5 | 4 |
| 5 | 4 | 5 | 5 | 5 | 5 | 5 | 4 | 5 | 5 | 2 | 5 | 5 | 5 | 5 | 5 | 2 | 5 | 2 | 5 | 5 | 5 | 5 | 5 | 1 | 2 | 5 |
| 5 | 3 | 4 | 4 | 3 | 4 | 4 | 4 | 4 | 4 | 3 | 4 | 4 | 4 | 4 | 2 | 2 | 4 | 2 | 3 | 4 | 4 | 4 | 4 | 3 | 2 | 4 |
| 4 | 3 | 5 | 5 | 2 | 3 | 5 | 5 | 3 | 5 | 5 | 4 | 2 | 4 | 4 | 2 | 2 | 4 | 2 | 4 | 4 | 4 | 4 | 3 | 2 | 2 | 2 |
| 5 | 5 | 5 | 5 | 3 | 3 | 5 | 5 | 3 | 4 | 4 | 4 | 3 | 4 | 4 | 2 | 2 | 2 | 3 | 4 | 5 | 5 | 4 | 3 | 2 | 2 | 2 |
| 3 | 3 | 5 | 5 | 3 | 3 | 5 | 5 | 3 | 4 | 4 | 4 | 3 | 4 | 4 | 3 | 4 | 4 | 4 | 4 | 4 | 5 | 5 | 3 | 4 | 4 | 4 |
| 4 | 3 | 4 | 3 | 4 | 4 | 4 | 3 | 2 | 4 | 2 | 4 | 4 | 3 | 4 | 4 | 2 | 2 | 2 | 3 | 4 | 4 | 4 | 3 | 2 | 2 | 4 |
| 5 | 4 | 5 | 2 | 4 | 5 | 4 | 4 | 4 | 4 | 3 | 4 | 5 | 4 | 5 | 5 | 1 | 2 | 2 | 4 | 4 | 4 | 4 | 2 | 2 | 2 | 5 |
| 5 | 3 | 5 | 2 | 5 | 5 | 4 | 3 | 3 | 4 | 2 | 4 | 4 | 3 | 4 | 4 | 2 | 3 | 2 | 4 | 3 | 4 | 5 | 3 | 2 | 2 | 5 |
| 5 | 4 | 5 | 2 | 4 | 5 | 4 | 4 | 4 | 5 | 2 | 5 | 5 | 5 | 5 | 5 | 1 | 2 | 2 | 4 | 4 | 4 | 5 | 4 | 2 | 2 | 5 |
| 5 | 5 | 5 | 3 | 5 | 4 | 5 | 4 | 4 | 5 | 2 | 4 | 5 | 4 | 2 | 5 | 2 | 2 | 2 | 4 | 4 | 5 | 5 | 4 | 2 | 1 | 5 |
| 5 | 4 | 5 | 3 | 5 | 5 | 5 | 5 | 5 | 5 | 3 | 5 | 4 | 4 | 4 | 4 | 2 | 2 | 2 | 4 | 4 | 5 | 5 | 3 | 2 | 2 | 4 |
| 5 | 4 | 4 | 3 | 5 | 5 | 5 | 4 | 3 | 5 | 2 | 5 | 5 | 5 | 5 | 5 | 2 | 2 | 2 | 4 | 4 | 5 | 5 | 3 | 2 | 2 | 5 |
| 5 | 5 | 4 | 3 | 5 | 5 | 5 | 4 | 5 | 5 | 2 | 4 | 4 | 4 | 4 | 4 | 1 | 1 | 1 | 3 | 3 | 4 | 4 | 4 | 2 | 2 | 5 |
| 5 | 4 | 4 | 3 | 5 | 5 | 5 | 4 | 4 | 4 | 2 | 5 | 5 | 4 | 4 | 4 | 1 | 2 | 2 | 4 | 3 | 5 | 5 | 4 | 2 | 2 | 5 |
| 4 | 4 | 4 | 3 | 4 | 5 | 5 | 3 | 3 | 5 | 2 | 5 | 5 | 4 | 5 | 5 | 2 | 2 | 2 | 5 | 5 | 5 | 5 | 3 | 2 | 2 | 5 |
| 4 | 5 | 5 | 4 | 5 | 5 | 4 | 4 | 4 | 4 | 3 | 4 | 4 | 4 | 4 | 4 | 2 | 2 | 2 | 4 | 4 | 4 | 5 | 4 | 2 | 2 | 5 |

Raw Data for Patient's Responses

1=Strongly Disagree, 2=Disagree, 3=Neutral, 4=Agree, 5=Strongly Agree

| Q 1 | Q 2 | Q 3 | Q 4 | Q 5 | Q 6 | Q 7 | Q 8 | Q 9 | Q1 0 | Q1 1 | Q1 2 | Q1 3 | Q1 4 | Q1 5 | Q1 6 | Q1 7 | Q1 8 | Q1 9 | Q2 0 | Q2 1 | Q2 2 | Q2 3 | Q2 4 | Q2 5 | Q2 6 | Q2 7 |
|-----|-----|-----|-----|-----|-----|-----|-----|-----|------|------|------|------|------|------|------|------|------|------|------|------|------|------|------|------|------|------|
| 4   | 4   | 5   | 5   | 4   | 4   | 5   | 5   | 4   | 5    | 4    | 5    | 3    | 4    | 4    | 4    | 4    | 3    | 3    | 4    | 4    | 4    | 3    | 4    | 2    | 2    | 5    |
| 5   | 5   | 5   | 4   | 4   | 4   | 5   | 5   | 3   | 4    | 4    | 4    | 4    | 4    | 4    | 5    | 5    | 4    | 4    | 4    | 5    | 5    | 4    | 3    | 4    | 4    | 4    |
| 5   | 5   | 5   | 4   | 4   | 3   | 5   | 5   | 3   | 4    | 4    | 4    | 5    | 4    | 5    | 5    | 5    | 5    | 4    | 4    | 5    | 5    | 4    | 3    | 5    | 5    | 5    |
| 5   | 4   | 4   | 5   | 4   | 3   | 2   | 2   | 2   | 4    | 3    | 4    | 3    | 4    | 3    | 5    | 4    | 5    | 2    | 4    | 3    | 4    | 4    | 2    | 4    | 2    | 2    |
| 5   | 4   | 4   | 4   | 5   | 4   | 4   | 4   | 4   | 4    | 4    | 5    | 3    | 4    | 4    | 4    | 4    | 4    | 4    | 4    | 4    | 4    | 4    | 3    | 1    | 1    | 5    |
| 2   | 2   | 4   | 4   | 2   | 2   | 2   | 2   | 2   | 2    | 2    | 2    | 2    | 2    | 2    | 1    | 3    | 3    | 2    | 3    | 3    | 3    | 3    | 2    | 3    | 3    | 2    |
| 5   | 5   | 5   | 4   | 4   | 5   | 5   | 4   | 5   | 4    | 4    | 5    | 2    | 4    | 3    | 5    | 3    | 4    | 3    | 4    | 5    | 4    | 3    | 3    | 2    | 1    | 1    |

|   |   |   |   |   |   |   |   |   |   |   |   |   |   |   |   |   |   |   |   |   |   |   |   |   |   |   |   |
|---|---|---|---|---|---|---|---|---|---|---|---|---|---|---|---|---|---|---|---|---|---|---|---|---|---|---|---|
| 5 | 5 | 5 | 5 | 5 | 5 | 5 | 3 | 4 | 5 | 4 | 5 | 4 | 5 | 5 | 2 | 1 | 4 | 5 | 5 | 5 | 5 | 5 | 5 | 5 | 1 | 1 | 1 |
| 4 | 4 | 4 | 4 | 4 | 4 | 4 | 4 | 4 | 4 | 4 | 4 | 4 | 4 | 4 | 4 | 4 | 4 | 4 | 4 | 4 | 4 | 4 | 1 | 5 | 4 | 4 | 4 |
| 4 | 4 | 4 | 3 | 3 | 3 | 3 | 3 | 3 | 3 | 3 | 4 | 3 | 3 | 3 | 4 | 3 | 4 | 4 | 5 | 5 | 5 | 2 | 3 | 2 | 2 | 2 |   |
| 3 | 3 | 3 | 3 | 3 | 4 | 4 | 4 | 4 | 4 | 3 | 3 | 3 | 4 | 4 | 3 | 3 | 4 | 3 | 5 | 5 | 5 | 2 | 4 | 1 | 1 | 2 |   |
| 5 | 5 | 5 | 5 | 4 | 4 | 4 | 4 | 4 | 4 | 4 | 4 | 4 | 4 | 4 | 4 | 4 | 4 | 4 | 4 | 5 | 1 | 3 | 4 | 1 | 1 | 1 |   |
| 5 | 4 | 5 | 4 | 3 | 3 | 3 | 3 | 3 | 3 | 3 | 3 | 4 | 4 | 4 | 4 | 4 | 4 | 5 | 5 | 5 | 5 | 1 | 4 | 2 | 2 | 2 |   |
| 5 | 5 | 4 | 4 | 5 | 5 | 5 | 4 | 4 | 5 | 5 | 5 | 5 | 4 | 4 | 4 | 4 | 4 | 4 | 4 | 4 | 4 | 1 | 2 | 1 | 1 | 2 |   |
| 3 | 4 | 4 | 4 | 4 | 4 | 3 | 4 | 2 | 2 | 4 | 4 | 2 | 4 | 4 | 4 | 4 | 4 | 2 | 4 | 4 | 3 | 3 | 2 | 2 | 2 | 2 |   |
| 3 | 4 | 4 | 4 | 4 | 4 | 3 | 4 | 2 | 2 | 4 | 4 | 2 | 4 | 4 | 4 | 4 | 4 | 2 | 4 | 4 | 3 | 3 | 2 | 2 | 2 | 2 |   |
| 3 | 4 | 5 | 4 | 4 | 4 | 4 | 5 | 2 | 4 | 4 | 5 | 4 | 4 | 4 | 4 | 4 | 4 | 5 | 4 | 4 | 5 | 5 | 4 | 2 | 2 | 1 |   |
| 5 | 4 | 5 | 5 | 4 | 4 | 5 | 4 | 2 | 5 | 4 | 5 | 4 | 4 | 4 | 4 | 5 | 5 | 4 | 4 | 4 | 4 | 4 | 4 | 4 | 4 | 4 |   |
| 3 | 4 | 5 | 1 | 2 | 1 | 2 | 3 | 1 | 1 | 3 | 2 | 1 | 1 | 2 | 4 | 4 | 1 | 2 | 1 | 5 | 4 | 1 | 3 | 1 | 1 | 1 |   |
| 4 | 4 | 4 | 4 | 3 | 3 | 4 | 4 | 4 | 4 | 5 | 4 | 3 | 4 | 4 | 4 | 4 | 5 | 3 | 4 | 3 | 5 | 4 | 3 | 3 | 3 | 4 |   |
| 4 | 5 | 5 | 4 | 5 | 5 | 4 | 4 | 4 | 4 | 4 | 4 | 2 | 4 | 4 | 4 | 4 | 4 | 4 | 4 | 4 | 4 | 4 | 4 | 4 | 4 | 4 |   |
| 4 | 4 | 3 | 4 | 4 | 2 | 4 | 4 | 3 | 3 | 4 | 4 | 2 | 4 | 4 | 4 | 4 | 4 | 4 | 4 | 4 | 4 | 4 | 4 | 4 | 4 | 3 |   |
| 5 | 5 | 5 | 5 | 4 | 5 | 5 | 3 | 3 | 5 | 5 | 5 | 3 | 5 | 3 | 5 | 3 | 5 | 4 | 4 | 5 | 5 | 3 | 3 | 3 | 3 | 3 |   |
| 5 | 5 | 5 | 5 | 4 | 3 | 5 | 5 | 2 | 4 | 4 | 4 | 4 | 4 | 4 | 4 | 4 | 4 | 4 | 4 | 5 | 5 | 3 | 3 | 4 | 4 | 4 |   |
| 5 | 4 | 4 | 4 | 4 | 4 | 4 | 5 | 2 | 4 | 4 | 4 | 5 | 3 | 5 | 5 | 5 | 4 | 5 | 5 | 5 | 5 | 3 | 2 | 5 | 5 | 5 |   |
| 5 | 4 | 4 | 4 | 4 | 4 | 4 | 5 | 2 | 4 | 4 | 4 | 5 | 3 | 5 | 5 | 5 | 4 | 5 | 5 | 5 | 5 | 3 | 2 | 5 | 5 | 5 |   |
| 4 | 4 | 4 | 3 | 3 | 4 | 4 | 4 | 4 | 4 | 4 | 4 | 5 | 5 | 4 | 5 | 5 | 3 | 4 | 4 | 5 | 4 | 4 | 2 | 2 | 4 | 5 |   |
| 5 | 5 | 4 | 4 | 3 | 3 | 3 | 3 | 3 | 3 | 3 | 3 | 3 | 3 | 3 | 3 | 3 | 3 | 3 | 3 | 3 | 3 | 3 | 3 | 3 | 3 | 3 |   |
| 5 | 4 | 4 | 4 | 5 | 5 | 4 | 4 | 4 | 4 | 4 | 5 | 4 | 4 | 5 | 4 | 4 | 3 | 4 | 4 | 5 | 4 | 4 | 4 | 3 | 3 | 3 |   |
| 5 | 5 | 4 | 4 | 3 | 3 | 3 | 3 | 3 | 3 | 3 | 3 | 3 | 3 | 3 | 3 | 3 | 3 | 3 | 3 | 3 | 3 | 3 | 3 | 3 | 3 | 3 |   |
| 4 | 3 | 3 | 2 | 5 | 5 | 4 | 3 | 3 | 5 | 2 | 4 | 2 | 3 | 4 | 5 | 4 | 4 | 2 | 3 | 3 | 5 | 2 | 2 | 1 | 2 | 3 |   |
| 5 | 4 | 4 | 4 | 5 | 5 | 4 | 4 | 4 | 4 | 4 | 5 | 4 | 4 | 5 | 4 | 4 | 3 | 4 | 4 | 5 | 4 | 4 | 4 | 3 | 3 | 5 |   |
| 5 | 5 | 5 | 5 | 4 | 3 | 5 | 5 | 2 | 4 | 4 | 4 | 4 | 4 | 4 | 4 | 4 | 4 | 4 | 4 | 5 | 5 | 3 | 3 | 4 | 4 | 4 |   |
| 4 | 4 | 3 | 4 | 4 | 4 | 5 | 3 | 3 | 4 | 4 | 4 | 2 | 4 | 4 | 4 | 4 | 4 | 4 | 4 | 4 | 5 | 5 | 3 | 3 | 4 | 4 |   |
| 5 | 5 | 4 | 5 | 5 | 5 | 5 | 5 | 4 | 5 | 5 | 4 | 4 | 4 | 5 | 5 | 4 | 2 | 4 | 5 | 4 | 5 | 4 | 4 | 3 | 3 | 4 |   |

|   |   |   |   |   |   |   |   |   |   |   |   |   |   |   |   |   |   |   |   |   |   |   |   |   |   |   |   |
|---|---|---|---|---|---|---|---|---|---|---|---|---|---|---|---|---|---|---|---|---|---|---|---|---|---|---|---|
| 5 | 5 | 4 | 4 | 5 | 5 | 5 | 4 | 4 | 5 | 5 | 5 | 5 | 4 | 4 | 4 | 4 | 4 | 4 | 4 | 4 | 4 | 1 | 2 | 1 | 1 | 2 |   |
| 5 | 5 | 5 | 4 | 5 | 5 | 4 | 5 | 2 | 4 | 4 | 4 | 5 | 4 | 4 | 4 | 5 | 5 | 5 | 5 | 4 | 5 | 3 | 3 | 5 | 5 | 5 |   |
| 5 | 4 | 5 | 4 | 4 | 5 | 5 | 5 | 3 | 4 | 4 | 5 | 5 | 5 | 4 | 5 | 5 | 4 | 4 | 5 | 5 | 5 | 4 | 2 | 5 | 5 | 5 |   |
| 4 | 3 | 5 | 4 | 3 | 4 | 3 | 4 | 4 | 2 | 4 | 2 | 2 | 2 | 4 | 5 | 4 | 2 | 4 | 4 | 3 | 5 | 3 | 2 | 2 | 4 | 4 |   |
| 5 | 5 | 5 | 2 | 3 | 3 | 4 | 5 | 4 | 4 | 3 | 2 | 2 | 4 | 4 | 5 | 4 | 5 | 3 | 4 | 3 | 5 | 5 | 5 | 1 | 5 | 5 |   |
| 4 | 2 | 5 | 2 | 3 | 5 | 5 | 5 | 5 | 5 | 5 | 5 | 3 | 5 | 4 | 5 | 4 | 3 | 3 | 5 | 4 | 5 | 5 | 5 | 4 | 5 | 5 |   |
| 2 | 4 | 3 | 2 | 3 | 4 | 4 | 4 | 4 | 4 | 4 | 4 | 4 | 4 | 4 | 4 | 4 | 4 | 4 | 4 | 4 | 4 | 4 | 4 | 4 | 4 | 4 |   |
| 2 | 2 | 2 | 3 | 2 | 2 | 2 | 3 | 2 | 3 | 2 | 4 | 2 | 4 | 4 | 2 | 4 | 2 | 2 | 4 | 2 | 4 | 2 | 2 | 1 | 1 | 1 |   |
| 4 | 4 | 4 | 4 | 4 | 4 | 4 | 4 | 2 | 4 | 4 | 4 | 2 | 4 | 4 | 4 | 5 | 4 | 4 | 2 | 4 | 4 | 4 | 3 | 3 | 2 | 2 |   |
| 4 | 4 | 3 | 3 | 4 | 3 | 3 | 3 | 3 | 3 | 3 | 3 | 3 | 3 | 3 | 3 | 3 | 3 | 4 | 3 | 3 | 3 | 3 | 3 | 3 | 3 | 3 |   |
| 5 | 5 | 4 | 5 | 4 | 4 | 5 | 5 | 2 | 4 | 4 | 4 | 4 | 4 | 4 | 5 | 5 | 5 | 4 | 5 | 5 | 5 | 4 | 3 | 5 | 5 | 5 |   |
| 4 | 4 | 3 | 3 | 3 | 4 | 3 | 3 | 3 | 3 | 3 | 3 | 3 | 4 | 3 | 3 | 3 | 3 | 4 | 4 | 4 | 3 | 3 | 3 | 3 | 3 | 4 |   |
| 4 | 4 | 3 | 3 | 3 | 4 | 3 | 3 | 3 | 3 | 3 | 3 | 3 | 4 | 3 | 3 | 3 | 3 | 4 | 4 | 4 | 3 | 3 | 3 | 3 | 3 | 4 |   |
| 5 | 4 | 5 | 5 | 5 | 4 | 4 | 4 | 3 | 4 | 3 | 4 | 5 | 5 | 4 | 5 | 5 | 5 | 4 | 4 | 4 | 4 | 5 | 3 | 5 | 5 | 5 |   |
| 4 | 4 | 5 | 4 | 3 | 3 | 4 | 4 | 2 | 4 | 4 | 4 | 4 | 4 | 4 | 4 | 3 | 4 | 4 | 4 | 4 | 4 | 4 | 2 | 5 | 4 | 4 |   |
| 5 | 4 | 4 | 5 | 4 | 4 | 3 | 4 | 2 | 4 | 4 | 3 | 3 | 3 | 4 | 4 | 4 | 3 | 3 | 4 | 4 | 4 | 3 | 4 | 2 | 4 | 4 |   |
| 4 | 5 | 5 | 5 | 5 | 4 | 4 | 4 | 1 | 4 | 4 | 4 | 3 | 4 | 4 | 3 | 2 | 3 | 4 | 4 | 4 | 4 | 4 | 1 | 4 | 4 | 4 |   |
| 4 | 4 | 4 | 3 | 4 | 4 | 4 | 4 | 4 | 4 | 4 | 4 | 4 | 4 | 4 | 4 | 3 | 4 | 3 | 4 | 3 | 4 | 4 | 4 | 2 | 4 | 4 |   |
| 4 | 3 | 5 | 5 | 4 | 3 | 5 | 5 | 2 | 4 | 4 | 4 | 4 | 4 | 4 | 5 | 5 | 5 | 5 | 5 | 5 | 5 | 4 | 2 | 4 | 4 | 4 |   |
| 4 | 4 | 5 | 3 | 4 | 4 | 4 | 4 | 3 | 5 | 4 | 5 | 4 | 5 | 4 | 3 | 3 | 4 | 5 | 5 | 4 | 4 | 3 | 1 | 5 | 5 | 4 |   |
| 5 | 5 | 5 | 4 | 4 | 3 | 4 | 4 | 3 | 4 | 4 | 4 | 3 | 4 | 4 | 2 | 2 | 4 | 4 | 4 | 4 | 4 | 3 | 3 | 4 | 4 | 4 |   |
| 4 | 4 | 5 | 5 | 5 | 4 | 4 | 4 | 4 | 4 | 5 | 4 | 5 | 4 | 4 | 5 | 4 | 4 | 4 | 4 | 5 | 5 | 3 | 2 | 4 | 4 | 4 |   |
| 3 | 4 | 5 | 3 | 4 | 4 | 3 | 3 | 1 | 4 | 4 | 4 | 3 | 4 | 4 | 5 | 2 | 2 | 4 | 4 | 4 | 4 | 3 | 2 | 4 | 4 | 5 |   |
| 4 | 4 | 3 | 3 | 4 | 4 | 4 | 4 | 2 | 2 | 4 | 4 | 4 | 4 | 4 | 4 | 4 | 4 | 4 | 4 | 4 | 4 | 4 | 3 | 4 | 4 | 2 |   |
| 4 | 5 | 4 | 4 | 5 | 5 | 5 | 5 | 4 | 5 | 4 | 5 | 4 | 5 | 5 | 5 | 5 | 3 | 3 | 4 | 4 | 4 | 4 | 4 | 2 | 2 | 2 | 4 |
| 5 | 4 | 4 | 3 | 5 | 5 | 4 | 4 | 3 | 4 | 4 | 4 | 4 | 4 | 5 | 4 | 5 | 4 | 4 | 4 | 4 | 3 | 3 | 4 | 4 | 4 | 4 |   |
| 5 | 5 | 5 | 5 | 5 | 5 | 5 | 5 | 5 | 5 | 5 | 4 | 3 | 3 | 5 | 5 | 5 | 5 | 4 | 5 | 5 | 5 | 5 | 2 | 1 | 1 | 1 |   |
| 5 | 5 | 4 | 4 | 3 | 4 | 3 | 3 | 3 | 4 | 4 | 4 | 3 | 4 | 3 | 4 | 3 | 3 | 3 | 3 | 3 | 4 | 4 | 3 | 3 | 3 | 3 |   |

|   |   |   |   |   |   |   |   |   |   |   |   |   |   |   |   |   |   |   |   |   |   |   |   |   |   |   |
|---|---|---|---|---|---|---|---|---|---|---|---|---|---|---|---|---|---|---|---|---|---|---|---|---|---|---|
| 4 | 4 | 4 | 3 | 4 | 3 | 4 | 4 | 3 | 4 | 3 | 4 | 3 | 3 | 4 | 4 | 4 | 4 | 4 | 3 | 4 | 3 | 3 | 3 | 3 | 3 | 4 |
| 3 | 3 | 4 | 4 | 4 | 4 | 3 | 3 | 3 | 3 | 3 | 4 | 3 | 4 | 4 | 4 | 4 | 4 | 3 | 3 | 4 | 3 | 3 | 3 | 4 | 3 | 4 |
| 4 | 4 | 3 | 2 | 2 | 5 | 3 | 4 | 2 | 4 | 4 | 4 | 2 | 4 | 4 | 3 | 2 | 2 | 2 | 3 | 3 | 4 | 3 | 3 | 3 | 4 | 4 |
| 3 | 2 | 2 | 2 | 2 | 2 | 2 | 2 | 2 | 2 | 2 | 2 | 2 | 2 | 2 | 2 | 2 | 2 | 2 | 2 | 2 | 2 | 2 | 2 | 2 | 2 | 2 |
| 5 | 5 | 4 | 5 | 4 | 4 | 4 | 3 | 3 | 5 | 3 | 3 | 3 | 4 | 4 | 4 | 4 | 3 | 3 | 5 | 4 | 5 | 5 | 3 | 3 | 4 | 5 |
| 3 | 3 | 3 | 3 | 3 | 2 | 2 | 4 | 2 | 2 | 2 | 4 | 1 | 4 | 3 | 3 | 3 | 3 | 2 | 3 | 3 | 3 | 4 | 3 | 3 | 3 | 3 |
| 4 | 4 | 5 | 5 | 4 | 5 | 5 | 3 | 3 | 5 | 4 | 5 | 3 | 5 | 3 | 3 | 3 | 3 | 4 | 4 | 4 | 4 | 4 | 3 | 4 | 4 | 4 |
| 4 | 4 | 5 | 5 | 5 | 4 | 5 | 5 | 5 | 4 | 4 | 4 | 2 | 4 | 4 | 4 | 5 | 5 | 4 | 4 | 5 | 5 | 4 | 4 | 2 | 2 | 4 |
| 4 | 4 | 4 | 4 | 5 | 4 | 4 | 4 | 3 | 4 | 4 | 5 | 4 | 5 | 5 | 5 | 5 | 5 | 5 | 4 | 4 | 4 | 4 | 3 | 3 | 3 | 4 |
| 4 | 4 | 5 | 3 | 4 | 4 | 4 | 2 | 3 | 4 | 3 | 4 | 3 | 4 | 3 | 2 | 2 | 3 | 3 | 3 | 4 | 3 | 3 | 4 | 1 | 1 | 2 |
| 5 | 5 | 5 | 5 | 5 | 5 | 5 | 5 | 5 | 5 | 5 | 5 | 5 | 5 | 5 | 5 | 5 | 5 | 5 | 5 | 5 | 5 | 5 | 5 | 5 | 5 | 5 |
| 5 | 5 | 4 | 4 | 5 | 5 | 5 | 5 | 4 | 5 | 5 | 4 | 4 | 5 | 5 | 5 | 5 | 5 | 4 | 5 | 5 | 5 | 4 | 4 | 4 | 4 | 5 |
| 4 | 4 | 4 | 4 | 4 | 4 | 4 | 4 | 4 | 4 | 4 | 4 | 4 | 4 | 4 | 4 | 4 | 4 | 4 | 4 | 4 | 4 | 4 | 4 | 4 | 4 | 4 |
| 5 | 4 | 4 | 3 | 5 | 5 | 4 | 4 | 3 | 4 | 4 | 4 | 4 | 4 | 5 | 4 | 5 | 4 | 4 | 4 | 4 | 3 | 3 | 4 | 4 | 4 | 4 |
| 5 | 4 | 5 | 4 | 4 | 4 | 5 | 4 | 4 | 5 | 3 | 4 | 2 | 4 | 4 | 4 | 3 | 4 | 4 | 4 | 5 | 5 | 3 | 2 | 5 | 5 | 5 |
| 5 | 4 | 5 | 4 | 4 | 4 | 4 | 4 | 5 | 4 | 2 | 4 | 5 | 4 | 4 | 5 | 5 | 5 | 4 | 4 | 4 | 4 | 4 | 2 | 5 | 5 | 4 |
| 5 | 5 | 5 | 4 | 5 | 4 | 5 | 4 | 3 | 5 | 2 | 4 | 3 | 5 | 4 | 4 | 4 | 4 | 4 | 5 | 4 | 4 | 5 | 3 | 5 | 4 | 4 |
| 5 | 5 | 5 | 4 | 5 | 3 | 4 | 5 | 3 | 4 | 5 | 3 | 2 | 4 | 4 | 4 | 4 | 5 | 5 | 4 | 4 | 4 | 4 | 3 | 4 | 4 | 4 |
| 4 | 4 | 5 | 5 | 3 | 3 | 4 | 4 | 1 | 4 | 4 | 4 | 4 | 4 | 4 | 4 | 4 | 4 | 5 | 4 | 4 | 3 | 3 | 3 | 5 | 5 | 5 |
| 4 | 3 | 5 | 4 | 3 | 3 | 4 | 4 | 1 | 4 | 3 | 4 | 2 | 5 | 5 | 5 | 5 | 5 | 4 | 4 | 4 | 4 | 3 | 1 | 5 | 4 | 4 |
| 5 | 4 | 5 | 3 | 3 | 4 | 5 | 4 | 5 | 4 | 4 | 4 | 2 | 5 | 4 | 4 | 4 | 4 | 4 | 5 | 4 | 4 | 3 | 5 | 5 | 5 | 5 |
| 3 | 3 | 5 | 4 | 4 | 3 | 4 | 4 | 1 | 4 | 4 | 4 | 4 | 4 | 5 | 2 | 2 | 2 | 4 | 5 | 5 | 5 | 2 | 1 | 4 | 4 | 4 |
| 4 | 4 | 4 | 5 | 3 | 3 | 3 | 3 | 2 | 4 | 4 | 4 | 2 | 5 | 5 | 5 | 5 | 5 | 4 | 5 | 4 | 4 | 4 | 5 | 4 | 5 | 5 |
| 2 | 4 | 4 | 5 | 4 | 4 | 4 | 5 | 3 | 5 | 5 | 5 | 3 | 5 | 4 | 2 | 2 | 2 | 4 | 4 | 4 | 4 | 4 | 3 | 4 | 4 | 4 |
| 4 | 4 | 5 | 5 | 5 | 4 | 4 | 5 | 5 | 5 | 4 | 5 | 5 | 5 | 5 | 5 | 5 | 5 | 5 | 4 | 4 | 5 | 4 | 4 | 2 | 2 | 2 |
| 5 | 5 | 5 | 4 | 4 | 4 | 5 | 5 | 2 | 5 | 5 | 5 | 5 | 4 | 4 | 5 | 5 | 5 | 5 | 5 | 4 | 4 | 5 | 3 | 4 | 5 | 5 |
| 2 | 3 | 3 | 3 | 3 | 3 | 3 | 3 | 3 | 3 | 3 | 2 | 3 | 2 | 2 | 3 | 3 | 3 | 3 | 3 | 3 | 3 | 3 | 3 | 3 | 3 | 3 |
| 4 | 4 | 5 | 5 | 5 | 5 | 4 | 4 | 4 | 3 | 3 | 4 | 4 | 4 | 4 | 5 | 5 | 5 | 3 | 5 | 4 | 4 | 5 | 4 | 5 | 5 | 5 |













|   |   |   |   |   |   |   |   |   |   |   |   |   |   |   |   |   |   |   |   |   |   |   |   |   |   |   |
|---|---|---|---|---|---|---|---|---|---|---|---|---|---|---|---|---|---|---|---|---|---|---|---|---|---|---|
| 4 | 4 | 4 | 4 | 4 | 4 | 4 | 4 | 4 | 4 | 4 | 4 | 4 | 4 | 4 | 4 | 4 | 4 | 4 | 4 | 4 | 4 | 4 | 4 | 4 | 4 |   |
| 3 | 3 | 3 | 3 | 3 | 3 | 3 | 3 | 3 | 4 | 3 | 3 | 3 | 3 | 4 | 4 | 3 | 3 | 3 | 3 | 3 | 3 | 3 | 3 | 3 | 3 |   |
| 4 | 4 | 4 | 3 | 3 | 3 | 4 | 2 | 1 | 3 | 3 | 2 | 1 | 4 | 3 | 4 | 3 | 3 | 3 | 4 | 4 | 4 | 3 | 1 | 3 | 2 | 4 |
| 4 | 4 | 4 | 4 | 5 | 5 | 5 | 4 | 4 | 4 | 5 | 5 | 3 | 5 | 5 | 4 | 5 | 5 | 5 | 4 | 4 | 4 | 4 | 4 | 4 | 4 | 4 |
| 3 | 3 | 3 | 3 | 3 | 3 | 3 | 3 | 3 | 3 | 3 | 3 | 3 | 3 | 3 | 3 | 3 | 3 | 3 | 3 | 3 | 3 | 3 | 3 | 3 | 3 | 3 |
| 4 | 4 | 4 | 4 | 4 | 4 | 4 | 4 | 4 | 4 | 4 | 4 | 4 | 4 | 4 | 4 | 4 | 4 | 4 | 4 | 4 | 4 | 4 | 4 | 4 | 4 | 4 |
| 4 | 4 | 5 | 4 | 3 | 5 | 3 | 4 | 3 | 4 | 4 | 4 | 3 | 4 | 3 | 4 | 4 | 4 | 3 | 2 | 4 | 4 | 4 | 4 | 4 | 3 | 3 |
| 4 | 4 | 4 | 4 | 4 | 4 | 4 | 4 | 4 | 4 | 4 | 4 | 4 | 4 | 4 | 4 | 4 | 4 | 4 | 4 | 4 | 4 | 4 | 4 | 4 | 4 | 4 |
| 4 | 4 | 4 | 4 | 4 | 4 | 4 | 4 | 4 | 4 | 4 | 4 | 4 | 4 | 4 | 4 | 4 | 4 | 4 | 4 | 4 | 4 | 4 | 4 | 4 | 4 | 4 |
| 4 | 4 | 4 | 4 | 4 | 4 | 4 | 4 | 4 | 4 | 4 | 4 | 4 | 4 | 4 | 4 | 4 | 4 | 4 | 4 | 4 | 4 | 4 | 4 | 4 | 4 | 4 |
| 4 | 4 | 4 | 4 | 4 | 4 | 4 | 4 | 4 | 4 | 4 | 4 | 4 | 4 | 4 | 4 | 4 | 4 | 4 | 4 | 4 | 4 | 4 | 4 | 4 | 4 | 4 |
| 4 | 4 | 4 | 4 | 4 | 4 | 4 | 4 | 4 | 4 | 4 | 4 | 4 | 4 | 4 | 4 | 4 | 4 | 4 | 4 | 4 | 4 | 4 | 4 | 4 | 4 | 4 |
| 4 | 4 | 4 | 4 | 4 | 4 | 4 | 4 | 4 | 4 | 4 | 4 | 4 | 4 | 4 | 4 | 4 | 4 | 4 | 4 | 4 | 4 | 4 | 4 | 4 | 4 | 4 |
| 2 | 1 | 3 | 2 | 1 | 2 | 1 | 1 | 1 | 2 | 1 | 1 | 3 | 1 | 3 | 1 | 1 | 1 | 3 | 3 | 3 | 3 | 1 | 3 | 3 | 1 | 1 |
| 4 | 4 | 3 | 4 | 5 | 4 | 3 | 3 | 4 | 3 | 3 | 4 | 3 | 4 | 4 | 3 | 4 | 3 | 3 | 4 | 3 | 3 | 4 | 4 | 4 | 3 | 3 |
| 4 | 4 | 4 | 3 | 4 | 4 | 4 | 5 | 4 | 5 | 4 | 4 | 2 | 4 | 5 | 4 | 4 | 4 | 1 | 2 | 4 | 4 | 4 | 4 | 4 | 5 |   |
| 5 | 5 | 5 | 4 | 4 | 5 | 4 | 4 | 3 | 3 | 4 | 5 | 4 | 4 | 4 | 5 | 5 | 5 | 5 | 4 | 4 | 5 | 4 | 3 | 4 | 2 | 2 |
| 3 | 5 | 4 | 5 | 4 | 4 | 5 | 5 | 2 | 5 | 5 | 5 | 3 | 2 | 1 | 4 | 3 | 3 | 5 | 4 | 1 | 3 | 3 | 2 | 3 | 1 | 3 |
| 5 | 5 | 5 | 5 | 5 | 5 | 5 | 5 | 5 | 5 | 5 | 5 | 5 | 5 | 5 | 5 | 5 | 3 | 4 | 5 | 5 | 5 | 3 | 4 | 4 | 5 | 4 |

**End of Raw Data**
